# Supplementary material for: Identification of a reticulocyte-specific binding domain of Plasmodium vivax reticulocyte-binding protein 1 that is homologous to the PfRh4 erythrocyte-binding domain
Source: PubMed Central journal article supplement (PMC4886630; doi:10.1038/srep26993), 2016-05-31
Supplement: srep26993-s1.pdf [file srep26993-s1.pdf]

## Supplementary Information

Identification of reticulocyte specific binding domain of *Plasmodium vivax* reticulocyte binding protein 1 (PvRBP1) homologous to PfRh4 erythrocyte binding domain

Jin-Hee Han<sup>1</sup>, Seong-Kyun Lee<sup>1</sup>, Bo Wang<sup>1,2</sup>, Fauzi Muh<sup>1</sup>, Myat Htut Nyunt<sup>1,3</sup>, Sunghun Na<sup>4</sup>, Kwon-Soo Ha<sup>5</sup>, Seok-Ho Hong<sup>6</sup>, Won Sun Park<sup>7</sup>, Jetsumon Sattabongkot<sup>8</sup>, Takafumi Tsuboi<sup>9</sup>, Eun-Taek Han<sup>1\*</sup>

Supplementary Fig. 1

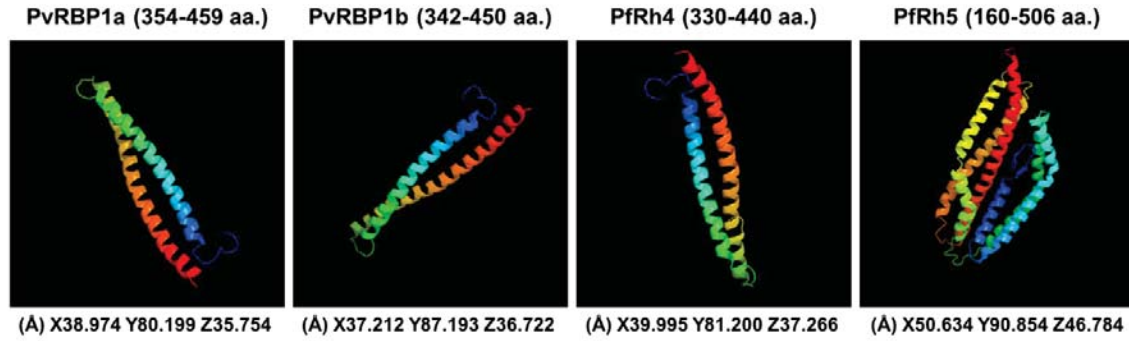

**Fig. S1** Reticulocyte binding like proteins in *Plasmodium* spp. 3D structure prediction by Phyre2 web portal (<http://www.sbg.bio.ic.ac.uk/phyre2/html/help.cgi?id=help/faq>). The template identified PfRh5 (c4u1gA) which bound to the monoclonal antibody. PvRBP1a, PvRBP1b and PfRh4 domains showed more than 99.5% confidence with PfRh5.
